# Supplementary material for: Identification and Expression Analysis of SLAC/SLAH Gene Family in Brassica napus L.
Source: MDPI journal article supplement (doi:10.3390/ijms22094671), 2021-04-28
Supplement: s1 [file s1]

# Identification and Expression Analysis of *SLAC/SLAH* Gene Family in *Brassica napus* L.

## Supplementary materials

**Table S1.** *SLAC/SLAH* genes in the *Brassica rapa* genome

| Gene ID      | Gene name        | Chromosome | Start location (bp) | Stop location (bp) |
|--------------|------------------|------------|---------------------|--------------------|
| LOC103865761 | <i>BrSLAH3-2</i> | A09        | 3670394             | 3675192            |
| LOC103874270 | <i>BrSLAH3-1</i> | A06        | 21648699            | 21654702           |
| LOC103854877 | <i>BrSLAH3-3</i> | A02        | 29417653            | 29422408           |
| LOC103834780 | <i>BrSLAH2-2</i> | A08        | 15000333            | 15003041           |
| LOC103867762 | <i>BrSLAH2-3</i> | A01        | 10012171            | 10019301           |
| LOC103834360 | <i>BrSLAH2-1</i> | A03        | 28016210            | 28018952           |
| LOC103871999 | <i>BrSLAC1-1</i> | A06        | 4998188             | 5000423            |
| LOC103848156 | <i>BrSLAH1-1</i> | A03        | 36546634            | 36556724           |
| LOC103838028 | <i>BrSLAH1-2</i> | A09        | 7332242             | 7334989            |
| LOC103838410 | <i>BrSLAH1-3</i> | A09        | 9759409             | 9772631            |
| LOC103838413 | <i>BrSLAH4-1</i> | A09        | 9775220             | 9789528            |

All *SLAC/SLAH* genes in *Brassica rapa* are named as *BrSLAC/SLAH* according to the order of closest orthologues in *Arabidopsis*.

**Table S2.** *SLAC/SLAH* genes in the *Brassica oleracea* genome

| Gene ID      | Gene name        | Chromosome | Start location (bp) | Stop location (bp) |
|--------------|------------------|------------|---------------------|--------------------|
| LOC106318874 | <i>BoSLAH3-2</i> | C09        | 4008913             | 4013581            |
| LOC106301292 | <i>BoSLAH3-1</i> | C07        | 37799902            | 37804661           |
| LOC106310325 | <i>BoSLAH2-2</i> | C08        | 17709299            | 17711960           |
| LOC106304635 | <i>BoSLAH2-1</i> | C07        | 44486030            | 44488377           |
| LOC106326919 | <i>BoSLAH2-3</i> | C01        | 14469888            | 14472390           |
| LOC106295057 | <i>BoSLAC1-1</i> | C05        | 5418536             | 5420688            |
| LOC106340717 | <i>BoSLAH1-1</i> | C04        | 22530746            | 22532251           |
| LOC106316982 | <i>BoSLAH4-1</i> | C09        | 13136998            | 13143186           |
| LOC106340224 | <i>BoSLAH4-2</i> | C04        | 26970788            | 26972968           |
| LOC106317353 | <i>BoSLAH1-2</i> | C09        | 13158561            | 13159882           |
| LOC106322198 | <i>BoSLAH4-3</i> | Unplaced   |                     |                    |
| LOC106338400 | <i>BoSLAH4-4</i> | C04        | 22423431            | 22424981           |

All *SLAC/SLAH* genes in *Brassica oleracea* are named as *BoSLAC/SLAH* according to the order of closest orthologues in *Arabidopsis*.

**Table S3.** Primers used for gene cloning and qRT-PCR

| Primer name            | Sequences(5'-3')          | Functions    |
|------------------------|---------------------------|--------------|
| <i>BnSLAH1-1</i> -FP   | ATGGAAAGCTTGGAAATTCCT     | Gene cloning |
| <i>BnSLAH1-1</i> -RP   | ACATGTACCAGTGCCGAGCCG     | Gene cloning |
| <i>BnSLAH3-2</i> -FP   | ATGGAGGGGAGATCAAATCGT     | Gene cloning |
| <i>BnSLAH3-2</i> -RP   | AGCCGAATCCTTCTCTTGAAT     | Gene cloning |
| <i>BnSLAH3-3</i> -FP   | ATGGAGGAGAGATCAAGTTGT     | Gene cloning |
| <i>BnSLAH3-3</i> -RP   | TGCGGAATCACTCTCTTGAGC     | Gene cloning |
| q <i>Bnactin7</i> -FP  | TGTTTGGATTGGAGGATCCATCTTG | qRT-PCR      |
| q <i>Bnactin7</i> -RP  | GTGGACGATGGATGGACCCG      | qRT-PCR      |
| q <i>BnSLAC1-1</i> -FP | TGGCGTGGTGGTCATATACT      | qRT-PCR      |
| q <i>BnSLAC1-1</i> -RP | GCCGAGGAAATGAAGGAGAGAG    | qRT-PCR      |
| q <i>BnSLAH1-1</i> -FP | ACGGGGAGCAGCAGAGATA       | qRT-PCR      |
| q <i>BnSLAH1-1</i> -RP | TACCTCCCGGTAGACGTTGA      | qRT-PCR      |
| q <i>BnSLAH3-2</i> -FP | TGCAAGCATGGGACTTAGGG      | qRT-PCR      |
| q <i>BnSLAH3-2</i> -RP | GTCTCGTTGGTCGGTAACCT      | qRT-PCR      |
| q <i>BnSLAH3-3</i> -FP | GTCCCACCTTCCATAGCTACA     | qRT-PCR      |
| q <i>BnSLAH3-3</i> -RP | ACCACCGGACATCCATTGAC      | qRT-PCR      |
| q <i>BnSLAH3-4</i> -FP | CGTACGCCGAGAATACTACCA     | qRT-PCR      |
| q <i>BnSLAH3-4</i> -RP | AGGAAGTGTGGCAACTCCTTAG    | qRT-PCR      |

**Table S4.** The FPKM values of expression levels of *BnSLAC/SLAH* genes in different tissues.

| Gene<br>name     | blossomy |      |       |        |       |        |        | wilting |        |       |         |          |
|------------------|----------|------|-------|--------|-------|--------|--------|---------|--------|-------|---------|----------|
|                  | root     | stem | leaf  | flower | sepal | pistil | pistil | pistil  | stamen | ovule | silique | pericarp |
| <i>BnSLAH2-1</i> | 0        | 0    | 0     | 0      | 0     | 0      | 0      | 0       | 0      | 0     | 0       | 0        |
| <i>BnSLAH2-4</i> | 0.00     | 0.00 | 0.00  | 0.00   | 0.00  | 0.00   | 0.00   | 0.00    | 0.00   | 0.00  | 0.00    | 0.00     |
| <i>BnSLAH3-1</i> | 0.00     | 0.00 | 0.00  | 0.00   | 0.00  | 0.00   | 0.00   | 0.00    | 0.00   | 0.00  | 0.00    | 0.00     |
| <i>BnSLAH2-5</i> | 0.00     | 0.00 | 0.00  | 0.00   | 0.00  | 0.00   | 0.00   | 0.00    | 0.00   | 0.00  | 0.00    | 0.00     |
| <i>BnSLAH4-6</i> | 0.00     | 0.00 | 0.00  | 0.00   | 0.00  | 0.00   | 0.00   | 0.00    | 0.00   | 0.00  | 0.00    | 0.00     |
| <i>BnSLAH4-5</i> | 0.00     | 0.06 | 0.00  | 0.00   | 0.00  | 0.00   | 0.00   | 0.00    | 0.00   | 0.00  | 0.00    | 0.00     |
| <i>BnSLAH3-6</i> | 0.05     | 0.00 | 0.02  | 0.36   | 0.00  | 0.00   | 0.00   | 0.00    | 0.08   | 0.97  | 0.03    | 0.33     |
| <i>BnSLAH2-3</i> | 0.10     | 0.00 | 0.00  | 0.03   | 0.00  | 0.00   | 0.00   | 0.00    | 0.00   | 0.00  | 0.00    | 0.00     |
| <i>BnSLAH4-4</i> | 0.10     | 0.00 | 0.09  | 0.00   | 0.00  | 0.00   | 0.00   | 0.28    | 0.00   | 0.00  | 0.00    | 0.00     |
| <i>BnSLAH1-2</i> | 0.00     | 0.00 | 0.00  | 7.64   | 0.00  | 26.01  | 0.00   | 0.00    | 34.05  | 0.00  | 0.46    | 1.77     |
| <i>BnSLAC1-2</i> | 0.93     | 1.15 | 2.88  | 1.36   | 9.62  | 0.48   | 0.63   | 0.68    | 0.46   | 0.73  | 1.22    | 2.39     |
| <i>BnSLAH3-2</i> | 9.30     | 4.49 | 1.03  | 2.51   | 7.98  | 7.83   | 99.87  | 22.74   | 8.41   | 10.28 | 6.08    | 4.97     |
| <i>BnSLAH4-3</i> | 0.04     | 0.00 | 0.00  | 0.10   | 0.00  | 0.00   | 0.00   | 0.00    | 0.00   | 0.06  | 0.00    | 0.00     |
| <i>BnSLAH3-3</i> | 16.65    | 3.70 | 10.91 | 2.36   | 7.99  | 6.68   | 18.53  | 18.36   | 12.51  | 0.39  | 9.11    | 8.46     |
| <i>BnSLAH4-2</i> | 0.07     | 0.00 | 0.00  | 0.07   | 0.00  | 0.00   | 0.00   | 0.00    | 0.00   | 0.00  | 0.00    | 0.00     |
| <i>BnSLAH1-4</i> | 0.00     | 0.00 | 0.00  | 0.04   | 0.00  | 0.00   | 0.00   | 0.00    | 0.06   | 0.00  | 0.17    | 0.00     |
| <i>BnSLAH3-4</i> | 34.84    | 6.02 | 8.44  | 0.52   | 5.80  | 1.32   | 85.43  | 41.18   | 18.74  | 0.22  | 3.04    | 8.56     |

|                  |      |      |      |      |      |      |      |      |        |      |      |      |
|------------------|------|------|------|------|------|------|------|------|--------|------|------|------|
| <i>BnSLAH3-5</i> | 0.03 | 0.00 | 0.05 | 3.36 | 0.15 | 0.09 | 0.00 | 0.05 | 2.18   | 3.36 | 0.43 | 0.00 |
| <i>BnSLAC1-1</i> | 2.45 | 1.53 | 3.38 | 1.83 | 6.23 | 1.30 | 1.00 | 0.94 | 0.62   | 0.82 | 1.66 | 2.74 |
| <i>BnSLAH2-2</i> | 0.48 | 2.12 | 0.03 | 0.00 | 0.05 | 0.05 | 0.00 | 0.00 | 0.00   | 0.00 | 0.22 | 0.17 |
| <i>BnSLAH1-1</i> | 0.21 | 0.00 | 0.00 | 1.07 | 0.32 | 7.52 | 3.24 | 1.26 | 266.69 | 0.42 | 0.00 | 0.00 |
| <i>BnSLAH1-3</i> | 0.04 | 0.00 | 0.00 | 0.00 | 0.00 | 0.00 | 0.00 | 0.00 | 0.51   | 0.00 | 0.00 | 0.00 |
| <i>BnSLAH4-1</i> | 0.03 | 0.00 | 0.00 | 0.00 | 0.00 | 0.12 | 0.00 | 0.00 | 0.00   | 0.00 | 0.00 | 0.00 |

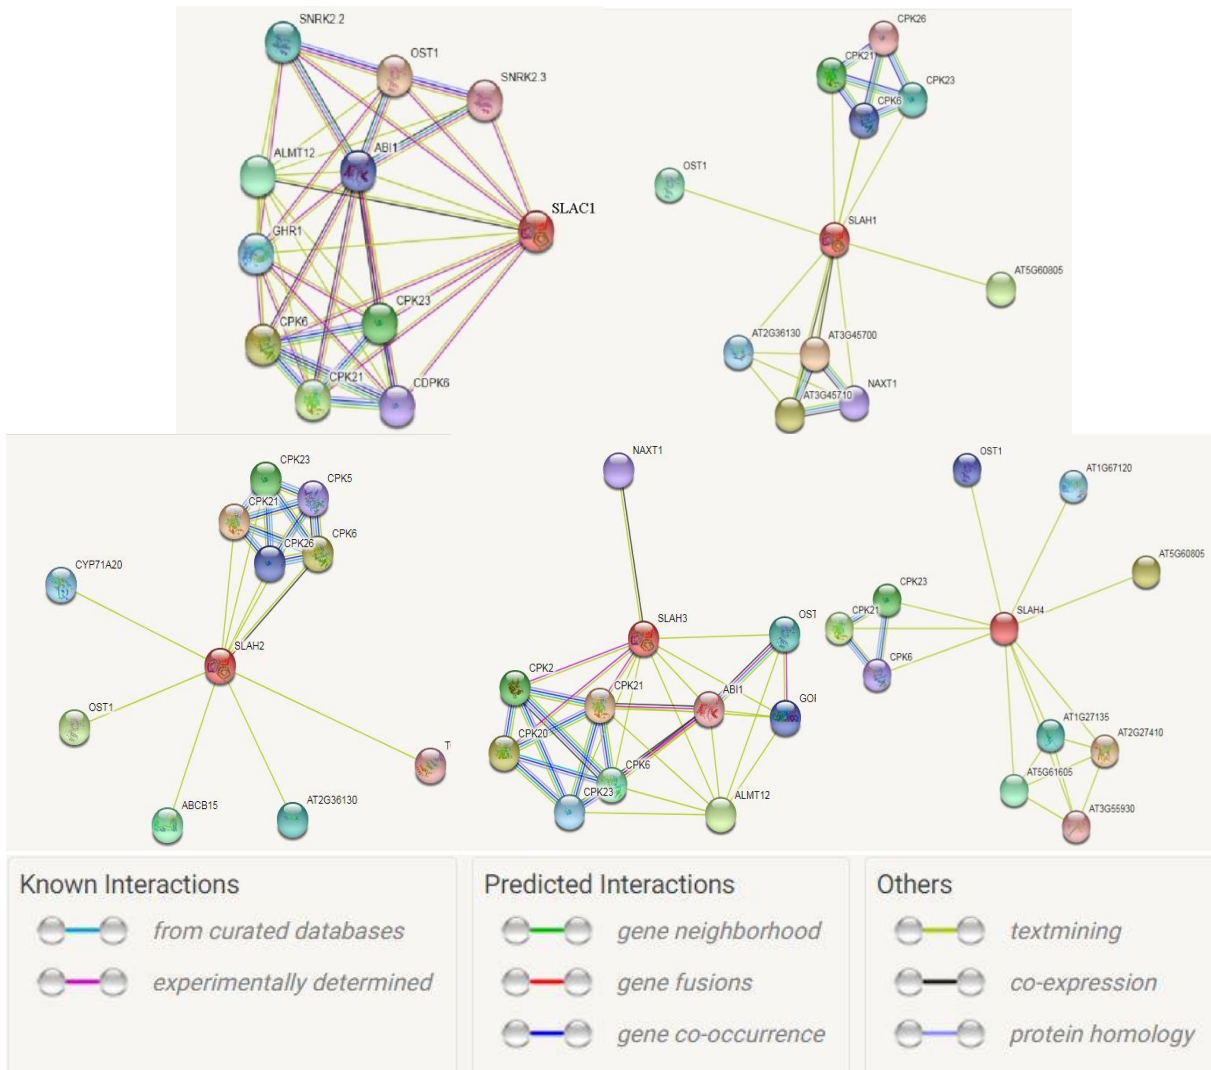

**Figure S1.** Prediction of SLAC/SLAH protein interaction in *Arabidopsis*.

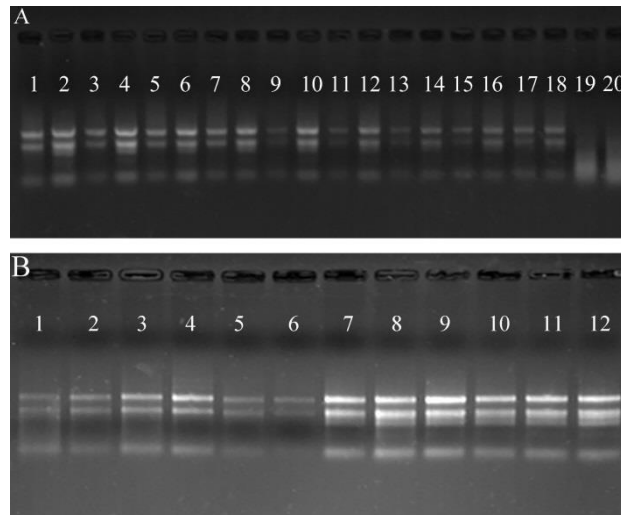

**Figure S2.** Electropherograms of RNA samples from high nitrogen level (HN, 7.5 mM), low nitrogen level (LN, 0.19 mM) and ABA treatment (100  $\mu$  M).

A: nitrogen treatment; 1. 3h LN roots (R), 2. 3h LN leaves (L), 3. 3h HN R, 4. 3h HN L, 5. 12h LN R, 6. 12h LN L, 7. 12h HN R, 8. 12h HN L, 9. 24h LN R, 10. 24h LN L, 11. 24h HN R, 12. 24h HN L, 13. 3d LN R, 14. 3d LN L, 15. 3d HN R, 16. 3d HN L, 17. 7d LN R, 18. 7d LN L, 19. 7d HN R, 20. 7d HN L;  
B: ABA treatment; 1. 3h control roots (R), 2. 12h control R, 3. 24h control R, 4. 3h ABA R, 5. 12h ABA R, 6. 24h ABA R, 7. 3h control leaves (L), 8. 12h control L, 9. 24h control L, 10. 3h ABA L, 11. 12h ABA L, 12. 24h ABA L.

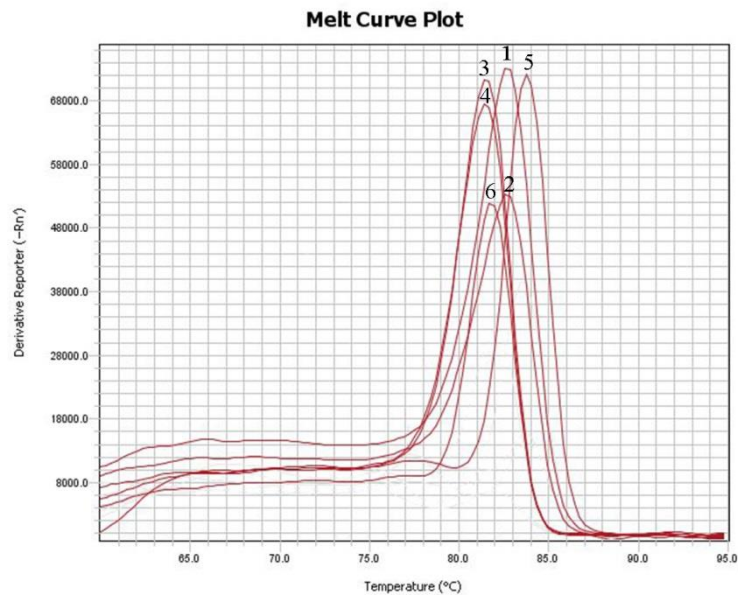

**Figure S3.** Melt curves of primers used for qRT-PCR

1. *qBnactin7*-FP/RP; 2. *qBnSLAC1-1*-FP/RP; 3. *qBnSLAH1-1*-FP/RP; 4. *qBnSLAH3-2*-FP/RP; 5. *qBnSLAH3-3*-FP/RP; 6. *qBnSLAH3-4*-FP/RP;
